# Supplementary material
Source: publisher figshare collection journal article supplement (https://future-science-group.figshare.com/articles/dataset/_/24080703)

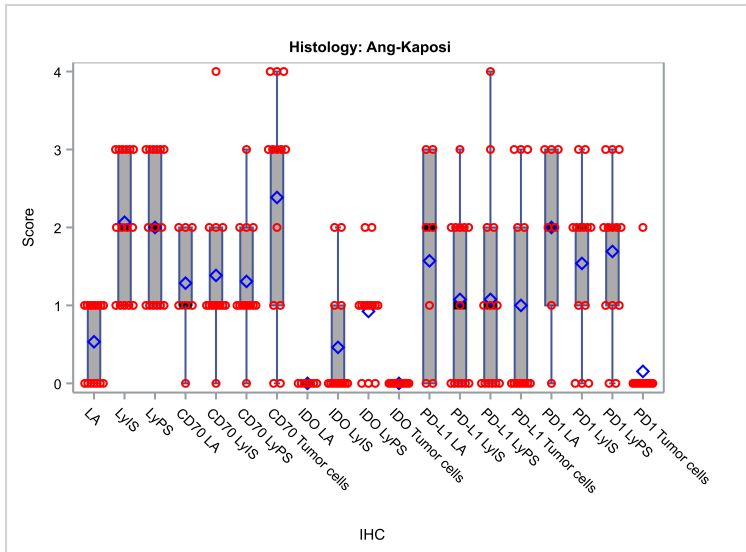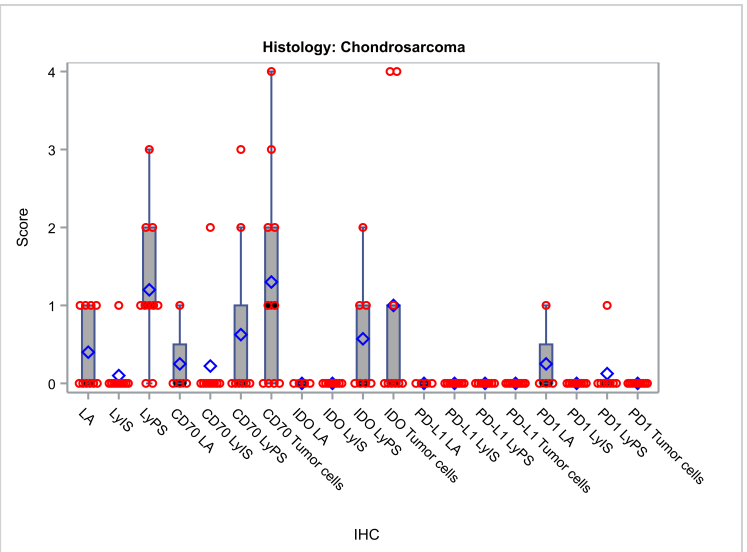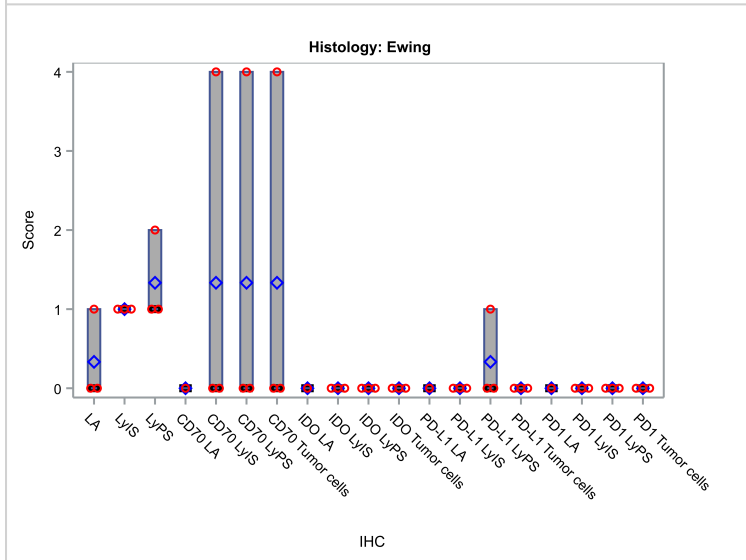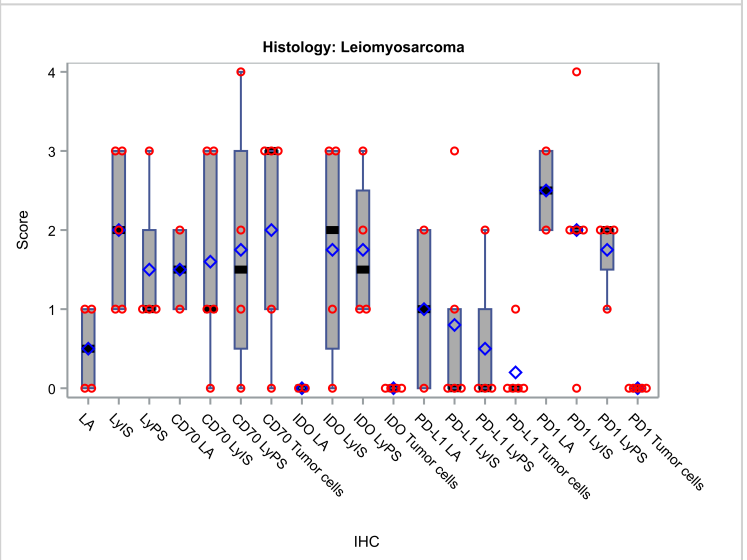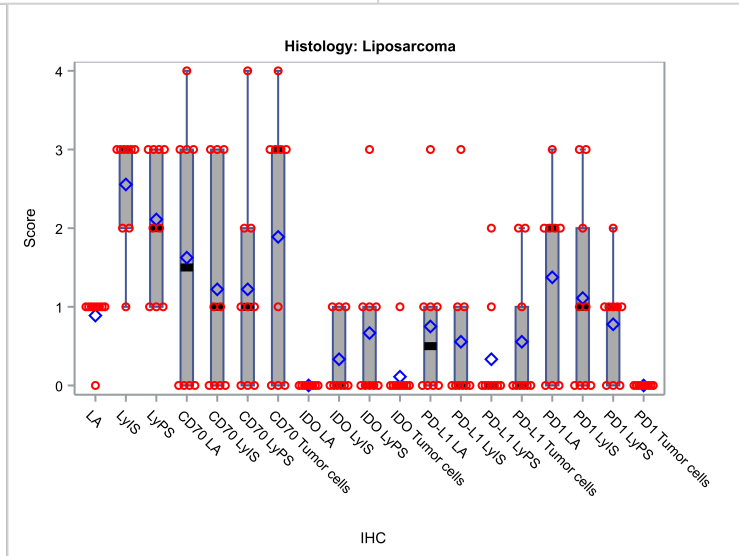

Supplement: Supplementary file 1 [file 1]

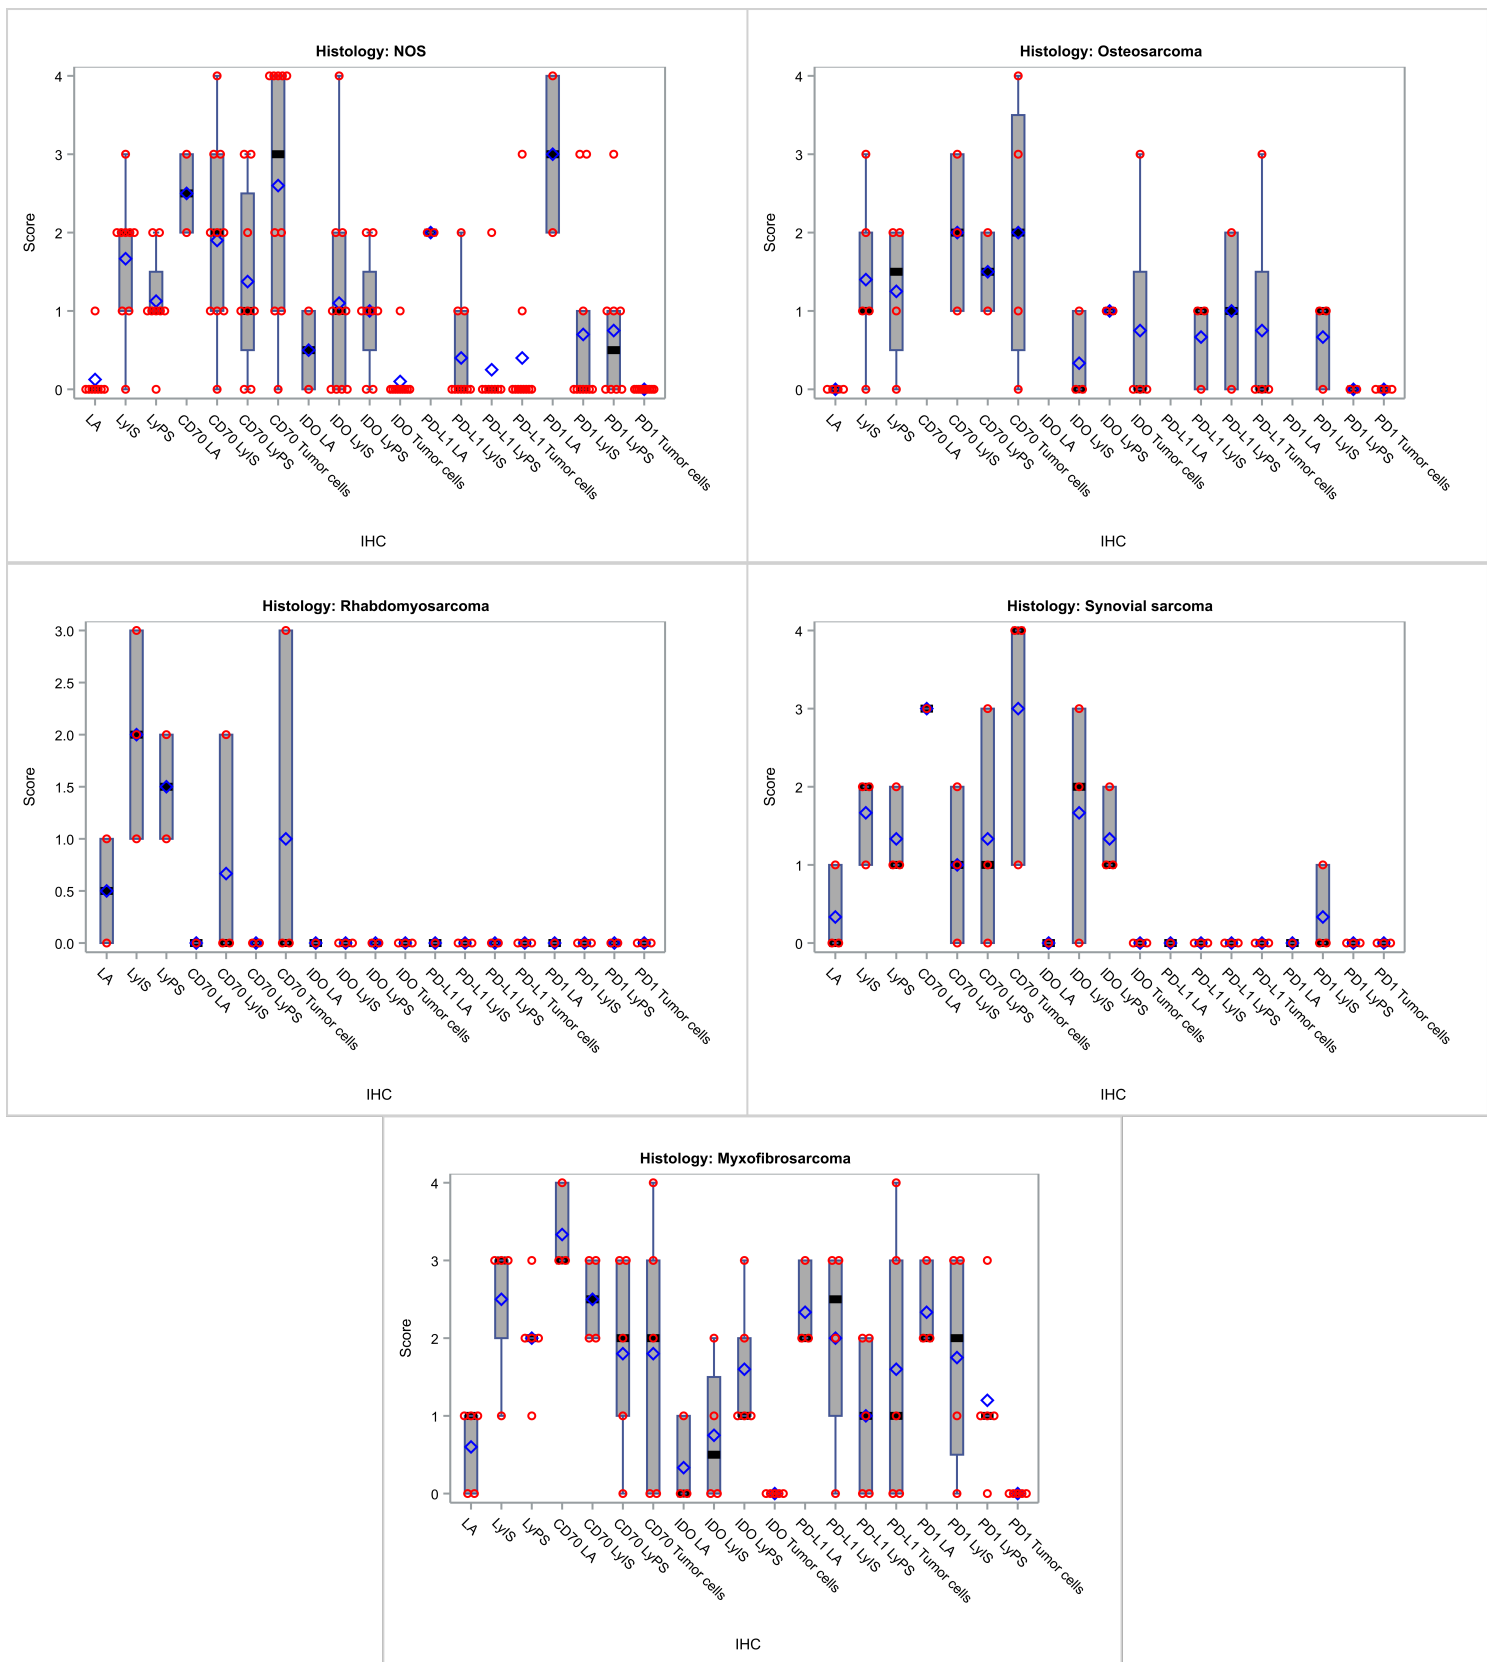

Supplement: Supplementary file 2 [file 1]

Figure S3

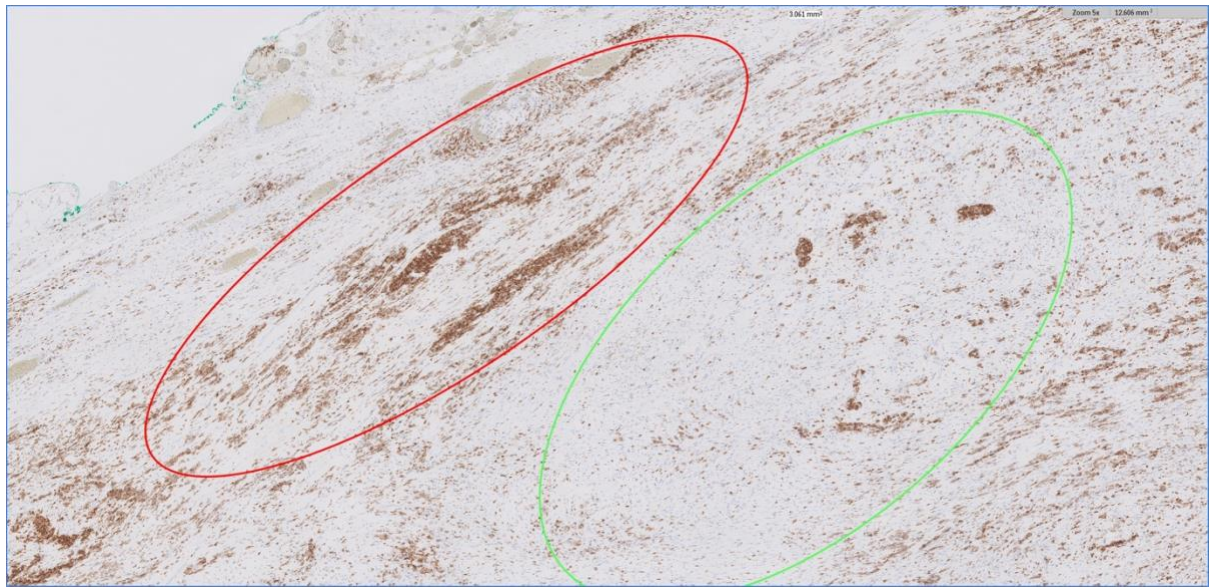

Supplement: Supplementary file 3 [file 1]
